1 **The Effects of Acute Salinity Challenges on Osmoregulation in Mozambique Tilapia**  
2 **Reared in a Tidally-Changing Salinity**

3

4 Benjamin P. Moorman<sup>a,b</sup>, Darren T. Lerner<sup>a,c</sup>, E. Gordon Grau<sup>a</sup> and Andre P. Seale<sup>a,\*</sup>

5

6 <sup>a</sup>*Hawaii Institute of Marine Biology, University of Hawaii, Kaneohe, HI 96744, USA*

7 <sup>b</sup>*Department of Molecular Biosciences and Bioengineering, University of Hawaii at Manoa,*  
8 *Honolulu, HI 96822, USA*

9 <sup>c</sup>*University of Hawaii Sea Grant College Program, University of Hawaii at Manoa, Honolulu,*  
10 *HI, 96822, USA.*

11 \*Corresponding author: Fax: +1 808 236 7443.

12 *E-mail address:* [seale@hawaii.edu](mailto:seale@hawaii.edu) (A.P. Seale).

13

14

15

16

17

18

19

20

21

22

23

24

25

26

27

28

29

30

31

32  
33  
34  
35  
36  
37  
38  
39  
40  
41  
42  
43  
44  
45  
46  
47  
48  
49  
50  
51  
52  
53  
54  
55  
56  
57  
58  
59  
60  
61  
62

## Abstract

**This study characterizes the differences in osmoregulatory capacity among Mozambique tilapia, *Oreochromis mossambicus*, reared in fresh water (FW), seawater (SW), or under tidally-driven changes in salinity. This was addressed through the use of an abrupt exposure to a change in salinity. We measured changes in: 1) plasma osmolality and prolactin (PRL) levels; 2) pituitary expression of prolactin (PRL) and its receptors, PRLR1 and PRLR2; 3) branchial expression of PRLR1, PRLR2, Na<sup>+</sup>/Cl<sup>-</sup> cotransporter (NCC), Na<sup>+</sup>/K<sup>+</sup>/2Cl<sup>-</sup> cotransporter (NKCC),  $\alpha$ 1a and  $\alpha$ 1b isoforms of Na<sup>+</sup>/K<sup>+</sup>-ATPase (NKA), cystic fibrosis transmembrane conductance regulator (CFTR), aquaporin 3 (AQP3) and Na<sup>+</sup>/H<sup>+</sup> exchanger 3 (NHE3). Mozambique tilapia reared in a tidal environment successfully adapted to SW while fish reared in FW did not survive a transfer to SW beyond the six hour sampling. With the exception of CFTR, the change in the expression of ion pumps, transporters, and channels was more gradual in fish transferred from tidally-changing salinities to SW than in fish transferred from FW to SW. Upon transfer to SW, the increase in CFTR expression was more robust in tidal fish than in FW fish. Tidal and SW fish successfully adapted when transferred to FW. These results suggest that Mozambique tilapia reared in a tidally-changing salinity, a condition that more closely represents their natural history, gain an adaptive advantage compared with fish reared in FW when facing a hyperosmotic challenge.**

## 63 1. Introduction

64

65 The rigorous control of osmotic homeostasis is essential to life for most vertebrates.  
66 Teleost fish in fresh water (FW) face the risk of excessive hydration and electrolyte loss across  
67 body surfaces. To counteract this tendency, FW-acclimated fish actively take up ions across the  
68 gill and gut and eliminate excess water by producing dilute urine (Evans et al., 2005). By  
69 contrast, teleost fishes in seawater (SW) must adapt to a dehydrating environment.

70 Osmoregulation in SW is facilitated through the active extrusion of monovalent ions by the gill  
71 and the acquisition of water through re-absorption by the gastrointestinal tract (Marshall, 2006).  
72 Mozambique tilapia (*Oreochromis mossambicus*) tolerate external salinities ranging from FW to  
73 double-strength SW (Stickney, 1986; Uchida et al., 2000; Fiess et al., 2007). Their natural  
74 distribution includes estuaries and the lower reaches of rivers, not generally more than a mile  
75 from the ebb and flow of the tide, from the Zambezi River to the southeast coast of South Africa  
76 (Trewavas, 1983). As with other teleosts, Mozambique tilapia maintain their plasma osmolality  
77 within a narrow physiological range, 305-330 mOsmolal in FW and 335-360 mOsmolal in SW  
78 (Seale et al., 2006a).

79 The hypophyseal hormone, prolactin (PRL), plays an essential role in FW  
80 osmoregulation in euryhaline teleosts (Pickford and Phillips, 1959; Dharmamba et al., 1967;  
81 Bern, 1983; Manzon, 2002). Consistent with its activity in FW, PRL release in Mozambique  
82 tilapia increases in response to physiologically relevant reductions in extracellular osmolality  
83 both *in vivo* and *in vitro* (Grau et al., 1981; Yada et al., 1994; Seale et al., 2002; Seale et al.,  
84 2006b; Seale et al., 2012c). Conversely, Mozambique tilapia transferred from FW to BW (22 ‰)  
85 or SW, showed a reduction in plasma levels of PRL within 6 h (Yada et al., 1994; Seale et al.,  
86 2012b). Prolactin is thought to act principally by stimulating ion uptake and reducing water  
87 intake across osmoregulatory epithelia, following binding to its receptors (PRLRs). The  
88 receptors, PRLR1 and PRLR2 are disparately regulated by extracellular osmolality (Breves et al.,  
89 2011; Fiol et al., 2009; Seale et al., 2012b). Branchial PRLR1 expression is induced when tilapia  
90 are transferred from SW to FW, in concert with the rise in PRL release from the pituitary. By  
91 contrast, PRLR2 expression is induced following transfer to SW. While the function of PRLR2 is  
92 unclear, its downstream signaling pathway has been shown to be distinct from that of PRLR1  
93 (Fiol et al., 2009).

94 The gill is a target for the actions of PRL and is regarded the primary site of net ion  
95 transport by the activities of highly specialized ionocytes (Kaneko, 2008; Hiroi and McCormick,  
96 2012). Driven by the osmoregulatory requirements associated with euryhalinity, different  
97 ionocyte cell types undergo rapid differentiation when faced with a change in salinity. Cell  
98 numbers of both new and pre-existing ionocytes change when FW fish are moved to SW and  
99 vice versa, indicating that existing ionocytes are regularly replaced with newly-differentiated  
100 cells under constant or changing ambient salinity. In tilapia, a  $\text{Na}^+/\text{Cl}^-$  cotransporter (NCC) and a  
101  $\text{Na}^+/\text{H}^+$  exchanger (NHE3) are specifically expressed in the apical membrane of FW-type  
102 ionocytes while a  $\text{Cl}^-$  channel, the cystic fibrosis transmembrane conductance regulator (CFTR),  
103 and a  $\text{Na}^+/\text{K}^+ / 2\text{Cl}^-$  cotransporter (NKCC) are expressed in the apical and basolateral membranes,  
104 respectively, of SW-type ionocytes (Hiroi et al., 2005; Inokuchi et al., 2008; Watanabe et al.,  
105 2008). The expression of NCC is directly regulated by PRL (Breves et al., 2010c). The  
106 electrochemical gradient that drives transmembrane ion transport is provided by the  
107 basolaterally-located ion pump,  $\text{Na}^+/\text{K}^+$  ATPase (NKA) (Richards et al., 2003). In tilapia,  
108 salmonids, and killifish, two isoforms of NKA,  $\alpha 1a$  and  $\alpha 1b$ , are differentially expressed in gill,  
109 according to the salinity of the habitat (Richards et al., 2003; Madsen et al., 2009; McCormick et  
110 al., 2009; Tipsmark et al., 2011; Berdan and Fuller, 2012). In tilapia, NKA $\alpha 1a$  expression  
111 predominates in FW-acclimated fish relative to SW- fish, while  $\alpha 1b$  expression has been shown  
112 to be greater or unchanged in SW-acclimated fish when compared with FW- fish (Tipsmark et  
113 al., 2011). Water transport in ionocytes of both FW- and SW- acclimated tilapia is mediated  
114 through basolaterally-located aquaporin 3 (AQP3) (Watanabe, 2005). Together with PRL  
115 expression and release, an examination of the expression patterns of genes that encode effectors  
116 of ion and water transport can provide a means for investigating how osmoregulatory pathways  
117 are governed in a particular environmental salinity rearing regime.

118 Extensive work has provided an understanding of how tilapia in FW and SW adapt to  
119 acute osmotic challenges (Dharmamba et al., 1967; Dharmamba et al., 1973; Ayson et al., 1993;  
120 Yada et al., 1994; Heijden et al., 1997; Sakamoto et al., 1997; Shepherd et al., 1999; Seale et al.,  
121 2002; Seale et al., 2006b; Inokuchi et al., 2008; Inokuchi et al., 2009; Ouattara et al., 2009;  
122 Breves et al., 2010d; Breves et al., 2010e; Breves et al., 2010c; Breves et al., 2011; Velan et al.,  
123 2011; Seale et al., 2012b). While the effects of salinity change on PRL cells and branchial  
124 mediators of ion transport are well documented in tilapia subjected to one-way-transfers between

125 two salinities, less is known about fish subjected to cyclic variations in salinity. Recently, we  
126 reared Mozambique tilapia in tidally-changing conditions to model some of the natural estuarine  
127 environments in which this species is found (Moorman et al., 2014). In spite of the changes in  
128 external salinity every 6 h, Mozambique tilapia reared under a tidal regimen maintained a  
129 constant plasma level of PRL whether in SW or FW (Moorman et al., 2014). In addition, we  
130 found that branchial expression of mediators of ion transport in fish reared in a tidally-changing  
131 salinity were intermediate to those of fish reared in FW or SW. To examine this osmoregulatory  
132 pattern in greater depth, we hypothesized that, relative to fish reared in steady-state FW or SW,  
133 rearing fish in tidally-varying salinities would more readily facilitate subsequent osmotic  
134 adaptation to SW or FW respectively. In the current study, we tested this hypothesis by  
135 comparing the osmoregulatory responses among fish transferred from one steady-state salinity to  
136 another (i.e. FW to SW and vice-versa), with those in fish that were reared in tidally-changing  
137 salinities and then subsequently maintained in either FW or SW.

138 To examine the effects of rearing condition on the adaptability of Mozambique tilapia to  
139 acute salinity challenges, we measure a variety of osmoregulatory endpoints in the pituitary and  
140 gill. Specifically, we measured: 1) plasma osmolality and PRL levels; 2) pituitary expression of  
141 PRL, PRLR1 and PRLR2; and 3) branchial expression of PRLR1, PLR2, NCC, NKCC1a, NKA  
142  $\alpha$ 1a, NKA  $\alpha$ 1b, CFTR, AQP3 and NHE3 in fish reared in FW, SW or tidally-changing salinities  
143 faced with acute salinity challenges.

144

## 145 **2. Results**

146

### 147 *2.1 Plasma parameters*

148

149 Significant effects of salinity rearing regime ( $P < 0.0001$ ) and time ( $P < 0.0001$ ) were  
150 observed on plasma osmolality. Plasma osmolality increased to 550 mOsmolal within 6 h when  
151 FW fish were transferred to SW and the fish did not survive to the 24 h sampling time. By  
152 contrast, the plasma osmolality of fish at the end of the FW phase of the tidal cycle (TF)  
153 transferred to SW increased only to 350 mOsmolal after 6 h and then decreased to steady-state  
154 SW levels within 24 h. When transferred to FW, the osmolality of fish reared in SW like that of  
155 tidally-reared fish at the end of the SW phase of the tidal cycle (TS) declined to 300 mOsmolal

156 within 48 h and then returned to steady-state FW levels within 7 d (Fig. 1A). Significant effects  
157 of salinity rearing regime ( $P<0.0001$ ) and time ( $P<0.01$ ) were observed on plasma PRL. Plasma  
158 PRL in FW fish transferred to SW declined from 15 ng/ml to 2 ng/ml within 6 h. Plasma PRL  
159 levels of TF fish transferred to SW, on the other hand, was not significantly different at any of  
160 the time points between 6 h and 7 d. When transferred to FW, plasma PRL in both SW- and TS-  
161 reared fish increased sharply by 6 h, but by 48 h, though still well above pre-transfer levels, had  
162 declined to levels that were similar to those of FW-reared fish (Fig. 1B).

163

## 164 *2.2 Pituitary gene expression of PRL and its receptors*

165

166 Significant effects of salinity rearing regime ( $P<0.0001$ ) and time ( $P<0.0001$ ) were  
167 observed on pituitary PRL expression. Pituitary PRL expression in FW fish was 4-fold greater  
168 than that in TF and TS fish and was 10-fold greater than SW fish. PRL expression declined by  
169 1/3 within 6 h after FW fish were transferred to SW. Within 48 h, PRL expression in TF fish  
170 transferred to SW fell to levels that were similar to its expression in SW fish. When SW and TS  
171 fish were transferred to FW, PRL increased and peaked at 48 h (Fig. 2A). Significant effects of  
172 salinity rearing regime ( $P<0.0001$ ) and time ( $P<0.0001$ ) were also observed on pituitary PRLR1  
173 expression. PRLR1 expression fell within 6 h when FW fish were transferred to SW. PRLR1  
174 expression rose by 6 h when TF fish were transferred to SW and then declined by 7 d to about  
175 1/2 of that observed in steady-state FW and SW. The transfer of SW and TS fish to FW produce  
176 a rise in PRLR1 expression which peaked at 48 h. PRLR1 expression in SW fish transferred to  
177 FW increased and then returned to steady-state FW and SW levels after 7 d. On the other hand,  
178 PRLR1 expression in TS fish transferred to FW fell to 1/2 steady-state FW and SW levels after 7  
179 d (Fig. 2B).

180 Significant effects of salinity rearing regime ( $P<0.0001$ ) and time ( $P<0.0001$ ) were also  
181 observed on pituitary PRLR2 expression. The transfer of FW fish to SW produced an increase in  
182 gill PRLR2 expression of 15-fold within 6 h. PRLR2 expression increased 5-fold at 6 h when TF  
183 fish were transferred to SW and then expression levels declined to levels that were not  
184 significantly different from those seen in steady-state FW and SW fish by 48 h. The transfer of  
185 SW fish to FW brought about a rise in PRLR2 expression that peaked at 24 h before returning to

186 baseline FW and SW levels at 48 h. The transfer of TS fish to FW was without effect on PRLR2  
187 expression (Fig. 2C).

188

### 189 *2.3 Branchial gene expression of PRL receptors; ion transporters and pumps; and ion and water* 190 *channels*

191

192 Significant effects of salinity rearing regime ( $P < 0.0001$ ) and time ( $P < 0.01$ ) were  
193 observed on branchial PRLR1 expression. The transfer of FW fish to SW reduced branchial  
194 PRLR1 expression by 25% at 6 h. The transfer of TF fish to SW reduced PRLR1 expression to  
195 levels that were similar to those of steady-state SW fish at 6 h. The transfer of both SW and TS  
196 fish to FW produced an increase in PRLR1 expression with a peak at 6 h (Fig. 3A).

197 Significant effects of salinity rearing regime ( $P < 0.01$ ) and time ( $P < 0.0001$ ) were  
198 observed on branchial PRLR2 expression. The transfer of FW fish to SW produced a 4-fold  
199 increase in PRLR2 expression at 6 h. The transfer of TF fish to SW produced a 1.5-fold rise in  
200 PRLR2 expression that peaked at 24 h before falling to initial TF levels. There was no significant  
201 difference in PRLR2 expression when SW fish were transferred to FW. The transfer of TS fish to  
202 FW produced an increase in PRLR2 expression at 24 h and 48 h with a return to initial TS levels  
203 after 7 d (Fig. 3B).

204 Significant effects of salinity rearing regime ( $P < 0.0001$ ) and time ( $P < 0.0001$ ) were  
205 observed in branchial NCC expression. The transfer of FW fish to SW brought about a decline in  
206 NCC expression within 6 h to levels observed in tilapia reared in steady-state SW. The transfer  
207 of TF fish to SW produced a decline in NCC expression which nevertheless remained above  
208 levels in fish reared in SW until 48 h after transfer. NCC expression of SW and TS fish increased  
209 in response to a transfer to FW and peaked at 48 h (Fig. 4A).

210 Significant effects of salinity rearing regime ( $P < 0.0001$ ) and time ( $P < 0.0001$ ) were  
211 observed on branchial NKCC expression. The transfer of FW fish to SW produced a 3-fold  
212 increase in NKCC expression at 6 h. The transfer of TF fish to SW produced a 1.5-fold increase  
213 in NKCC expression that peaked at 24 h. The transfer of both SW and TS fish to FW brought  
214 about a fall in the expression of NKCC within 48 h which reached levels that were similar to  
215 those in fish reared in FW (Fig. 4B).



216 Significant effects of salinity rearing regime ( $P < 0.0001$ ) and time ( $P < 0.0001$ ) were  
217 observed on branchial NKA  $\alpha 1a$  expression. The transfer of FW fish to SW produced an 80%  
218 decline in NKA  $\alpha 1a$  expression at 6 h. NKA  $\alpha 1a$  expression in TF fish was 50% of what was  
219 seen in FW fish before the start of the transfer and by 48 h the expression in TF fish decreased to  
220  $1/10^{\text{th}}$  of its initial expression levels. The transfer of both SW and TS fish to FW produced a 10-  
221 fold increase in NKA  $\alpha 1a$  expression by 24 h which continued to increase through to 7 d after  
222 transfer. The peak expression of NKA  $\alpha 1a$  was greater in SW fish than TS fish when both were  
223 transferred to FW (Fig. 4C).

224 Significant effects of salinity rearing regime ( $P < 0.0001$ ) were observed on branchial  
225 NKA  $\alpha 1b$  expression. The transfer of FW fish to SW brought about a fall in the expression of  
226 NKA  $\alpha 1b$  within 6 h. The transfer of TF fish to SW brought about significant reduction in NKA  
227  $\alpha 1b$  expression, but only at 24 h after transfer. The transfer of SW fish to FW produced a 4-fold  
228 increase in NKA  $\alpha 1b$  expression at 24 h and at 7 d with an intervening decline to pre-transfer  
229 levels at 48 h. The transfer of TS fish to FW produced a 2.5-fold increase in NKA  $\alpha 1b$  at 6 h, a  
230 rise that was maintained through 7 d (Fig. 4D).

231 Significant effects of salinity rearing regime ( $P < 0.0001$ ) and time ( $P < 0.0001$ ) were  
232 observed on branchial CFTR expression. The transfer of FW fish to SW yielded a 2-fold increase  
233 in CFTR expression by 6 h. Expression of CFTR in TF fish transferred to SW increased 3-fold  
234 by 6 h and then declined to pre-transfer levels by 24 h. The transfer of SW fish to FW brought  
235 about a fall in CFTR expression by 6 h. CFTR expression of TS fish transferred to FW fell  
236 significantly by 6 h, falling further by 24 h to levels that were similar to those of fish reared in  
237 FW (Fig. 5A).

238 Significant effects of salinity rearing regime ( $P < 0.0001$ ) and time ( $P < 0.01$ ) were  
239 observed on branchial AQP3 expression. The transfer of FW fish to SW had no significant effect  
240 of AQP3 expression at 6 h. By contrast, the transfer of TF fish to SW produced a 90% decline in  
241 AQP3 expression by 48 h. The transfer of SW fish to FW produced an increase in AQP3  
242 expression within 6 h which continued to rise to the end of the study at 7 d. The magnitude of the  
243 change in branchial AQP3 expression was greater in TS fish transferred to FW than in SW fish  
244 transferred to FW; TS fish transferred to FW had greatest AQP3 expression 48 h after transfer  
245 (Fig 10B).



246 Significant effects of salinity rearing regime ( $P < 0.0001$ ) were observed on branchial  
247 NHE3 expression. When FW fish were transferred to SW, NHE3 expression declined by 1/2 in 6  
248 h. The transfer of TF fish to SW was without significant effect on NHE3 expression at 6 h or 24  
249 h, but produced a significant decrease by 48 h. The transfer of SW fish to FW had no significant  
250 effect on NHE3 expression at either 6 h or 24 h after transfer, but produced a 2.5-fold rise by 48  
251 h. The transfer of TS fish to FW produced an increase in NHE3 expression in within 6 h, a rise  
252 that continued to increase to a peak at 24 h before falling to levels observed in FW-reared fish  
253 (Fig. 5C).

254

### 255 3. Discussion

256

257 The principal objective of the present study was to compare endocrine and  
258 osmoregulatory responses of Mozambique tilapia reared in either FW, SW, or in salinity that  
259 varied with tidal frequency between FW and SW. This was done by measuring the effects of  
260 changes in salinity on PRL, its receptors as well as on osmoregulatory elements of the gill. This  
261 was done in conjunction with the assessment of the ability of fish reared under different salinity  
262 regimes to adapt to a sustained change in salinity. The main findings of this study were that: 1)  
263 rearing fish in a tidally-changing salinity, which more closely represents their natural  
264 environment, significantly improves the ability to survive the transfer to SW compared with that  
265 of FW-reared tilapia; 2) tilapia reared in either SW or a tidal salinity regime easily adapt when  
266 transferred to FW; 3) When transferred to FW, both SW and tidally-reared tilapia, show similar  
267 patterns of change in the branchial mRNA expression of effectors of ion transport measured; and  
268 4) unlike the other effectors of ion transport measured, CFTR and AQP3 mRNA expression  
269 increased and decreased, respectively, more robustly in fish transferred from a tidally-changing  
270 salinity to SW than in FW fish transferred to SW .

271 In both the current experiment and previous experiments with Mozambique tilapia, it has  
272 been shown that osmolality dramatically increases when fish are transferred from FW to SW.  
273 Similarly, the extent of the osmolality increase and survival rate are dependent on the rate at  
274 which they are transferred. Tilapia are able to survive when transferred to an intermediate  
275 salinity before being transferred to SW, but are unable to survive a direct transfer (Yada et al.,  
276 1994; Seale et al., 2002; Breves et al., 2010e; Seale et al., 2012b). It has been shown through

277 many studies that the survival threshold is between 450 mOsmolal and 550 mOsmolal (Yada et  
278 al., 1994; Seale et al., 2002; Kajimura et al., 2004; Wang et al., 2009; Breves et al., 2010d;  
279 Breves et al., 2010e; Seale et al., 2012b). Tilapia reared in a tidally-changing salinity and then  
280 exposed to SW for seven days moved to SW with no mortality, suggesting that they were  
281 completely acclimated to SW. We have observed previously that plasma osmolality of tilapia  
282 reared in a tidally-changing salinity fluctuated between 320 mOsmolal and 345 mOsmolal in the  
283 FW and SW phases of the cycle respectively (Moorman et al., 2014). Previous experiments have  
284 shown that 320 mOsmolal and 345 mOsmolal are consistent with the plasma osmolality of  
285 Mozambique tilapia held for prolonged periods in FW and SW respectively (Seale et al., 2002;  
286 Magdeldin et al., 2007; Breves et al., 2010c).

287 PRL is essential for maintaining osmoregulatory homeostasis by euryhaline teleosts in  
288 FW (Pickford and Phillips, 1959; Dharmamba et al., 1967). Prolactin acts by reducing water  
289 permeability and increasing ion uptake, at least in part, by upregulating NCC mRNA expression  
290 in the gills (Breves et al., 2010c). Pituitary PRL release is regulated directly by decreases in  
291 extracellular osmolality that accompany FW acclimation (Nagahama et al., 1975; Wigham et al.,  
292 1977; Grau et al., 1981; Helms et al., 1991; Borski et al., 1992; Shepherd et al., 1999; Seale et  
293 al., 2002; Seale et al., 2006b; Seale et al., 2012b; Seale et al., 2012a). Likewise, circulating  
294 plasma PRL levels in FW tilapia are higher than in SW tilapia (Yada et al., 1994; Seale et al.,  
295 2002; Seale et al., 2006b). Moving tilapia from FW to SW leads to a fall in plasma PRL levels;  
296 conversely, moving tilapia from SW to FW produces a rapid increase in plasma PRL (Yada et  
297 al., 1994; Seale et al., 2002; Seale et al., 2006b; Seale et al., 2012b). Recently, we found that  
298 Mozambique tilapia reared in tidally-changing salinities do not change plasma PRL with each  
299 phase of the tidal cycle. This suggests that the PRL-sensitive osmoregulatory elements are  
300 already in action and do not require a "burst" of PRL to be activated. Thus, when exposed to the  
301 6 h FW phase of the tidal cycle, TS tilapia are able to regulate osmolality at 320 mOsmolal,  
302 exactly as do fish maintained in FW (Moorman et al., 2014). In the current study, we found that  
303 PRL significantly increased only after TS fish had been held in FW for 24 h, a pattern that was  
304 paralleled in PRL gene expression in the pituitary. This suggests that there is a threshold between  
305 6 and 24 h post-FW exposure for which an elevation in plasma PRL becomes necessary to  
306 maintain osmotic balance.

307 We also examined the impact of rearing salinity, i.e. FW, SW or tidally varying, on the  
308 responses of gill and pituitary PRLR1 and PRLR2 expression to a change in salinity. It is to be  
309 noted that in this study, that the response of PRLR1 and PRLR2 expression differs not only  
310 according to the direction of salinity transfer, but also between the gill and pituitary. Previous  
311 studies have shown that branchial PRLR1 expression is stimulated when fish are transferred  
312 from SW to FW and suppressed when fish are transferred from FW to SW (Breves et al., 2010d;  
313 Breves et al., 2011). Furthermore, branchial *prlr1* levels decrease after hypophysectomy in SW  
314 but not in FW, suggesting that *prlr1* expression is regulated, at least in part, by the pituitary  
315 (Breves et al., 2010b). The expression of PRLR2, on the other hand, follows an inverse pattern,  
316 where increases are seen in gill and PRL cells under hyperosmotic conditions (Fiol et al., 2009).  
317 In the current study, FW fish transferred to SW decreased pituitary PRLR1 expression, while TF  
318 fish transferred to SW transiently increase PRLR1 expression at 6 h before decreasing.  
319 Conversely, in transfers from both SW and TS to FW, there was a rise in PRLR1 expression at  
320 48 h before subsiding to pre-transfer levels, or lower, by 7 d. By contrast, in gill, the response of  
321 PRLR1 expression to transfers to FW and SW were more pronounced than that in pituitary. This  
322 difference in expression pattern may be related to the differences in the role of PRL between the  
323 pituitary, where it is produced, and gill, a main target for the regulation of effectors of ion  
324 transport.

325 In both pituitary and gill, PRLR2 mRNA expression increased in FW and TF fish  
326 transferred to SW, although the response from fish reared in a tidally changing environment was  
327 less prominent. This range of responses could be tied to the changes seen in plasma osmolality,  
328 which climb to much higher levels following FW to SW transfers than from TF to SW. We have  
329 previously found that PRLR2 expression in dispersed PRL cells is directly proportional to  
330 increases in medium osmolality (Seale et al., 2012). The significance of this tight regulation by  
331 extracellular osmolality may be tied to the involvement of this PRLR isoform in the cellular  
332 remodeling of ionocytes required during SW acclimation. Two splice variants have been  
333 described for PRLR2, a short non-functional variant and a long functional variant (Fiol et al.,  
334 2009). It was proposed that the transient increase in PRLR2 after fish are transferred from FW to  
335 SW provides an increase in osmotolerance which supports cell survival during the critical time  
336 when the gill epithelium is being restructured for the change in direction of ion transport (Fiol et  
337 al., 2009). On the other hand, in the pituitary, it has been suggested that PRL secretion may be

338 subject to negative feedback from PRL (Nagahama et al., 1975). Based on the differential  
339 regulation of pituitary PRLR1 and PRLR2 by extracellular osmolality, we have previously  
340 proposed that autocrine regulation of PRL cell activity through PRLRs, may serve to fine tune  
341 the effects of PRL (Seale et al., 2012b). Thus, similar to the role of PRLR2 suggested in gill, the  
342 increase in PRLR2 expression in tilapia PRL cells in response to hyperosmotic conditions could  
343 be a mechanism to maintain low plasma PRL levels in a hyperosmotic environment.

344 It has been shown that exposing tilapia to an osmotic challenge both increases the mRNA  
345 expression of appropriate ion transporting proteins while reducing the mRNA expression of ion  
346 transporting proteins that would be maladaptive (Hiroi et al., 2005; Hiroi et al., 2008; Breves et  
347 al., 2010e; Tipsmark et al., 2011; Velan et al., 2011). NKA provides the driving force for ion  
348 transport within ionocytes. In salmon, NKA  $\alpha$ 1a expression is higher in FW than in SW and  
349 NKA  $\alpha$ 1b expression is higher in SW than in FW (Madsen et al., 2009; McCormick et al., 2009).  
350 This pattern of salinity-dependent NKA isoform expression was also described in tilapia  
351 (Tipsmark et al., 2011). Consistent with previous experiments in tilapia, our current experiment  
352 showed higher NKA  $\alpha$ 1a expression in FW- than in SW-acclimated fish (Tipsmark et al., 2011;  
353 Moorman et al., 2014). Likewise, NKA  $\alpha$ 1a expression increased when fish were transferred  
354 from SW to FW and decreased when fish were transferred from FW to SW (Tipsmark et al.,  
355 2011; Moorman et al., 2014). Changes in NKA  $\alpha$ 1b expression, however, have not been as  
356 consistent among past studies in tilapia. While Tipsmark and co-workers (2011) found NKA  $\alpha$ 1b  
357 expression in the gill to increase by 1 day in fish that were transferred from FW to SW, our  
358 previous study found that steady-state branchial NKA  $\alpha$ 1b expression was higher in FW fish  
359 than in SW fish (Tipsmark et al., 2011; Moorman et al., 2014). While differences in the approach  
360 between both studies have been discussed (Moorman et al., 2014), the nature of this discrepancy  
361 remains uncertain, as in the current experiment both NKA isoforms changed following a similar  
362 pattern.

363 Previous experiments have shown that mRNA expression of NHE3 is higher in FW than  
364 in SW fish, which is consistent with its role in ion uptake (Inokuchi et al., 2008; Watanabe et al.,  
365 2008; Moorman et al., 2014). We observed that branchial mRNA expression of NCC, NKA  $\alpha$ 1a,  
366 NKA  $\alpha$ 1b, and NHE3 decreased more rapidly in fish transferred from FW to SW than in from  
367 TF to SW. This suggests that the rapid decrease in mRNA expression of effectors of ion uptake  
368 was not enough to maintain survival during acute hyperosmotic challenge. By contrast, a close

369 examination of the response patterns of branchial mRNA expression of CFTR and AQP3 may  
370 underlie the failure of tilapia to survive an acute transfer to SW.

371 Consistent with their role in ion extrusion, and in agreement with previous research, we  
372 observed increases in NKCC1a and CFTR when FW fish were transferred to SW (Inokuchi et  
373 al., 2008; Breves et al., 2010e). While branchial NKCC expression increased in fish transferred  
374 from FW to SW by 6 h, it took 24h for a significant rise in NKCC expression to be observed in  
375 fish transferred from TF to SW. This could be partially explained by the lower baseline  
376 expression levels of NKCC in fish in FW relative to those in TF. We have also shown that  
377 NKCC immunofluorescence is maintained at similar intensities between both phases of the tidal  
378 cycle and close to those observed in SW fish (Moorman et al., 2014). At any rate, NKCC  
379 expression levels were similar between FW and TF fish transferred to SW, but only the fish that  
380 were reared in tidal conditions survived the transfer. By contrast, branchial CFTR expression  
381 changed rapidly and dramatically in from both steady-state and tidal salinities, and in both  
382 directions of transfer, indicating a critical role in acclimating to acute changes in salinity.  
383 Consistent with its role in providing a conduit for  $\text{Cl}^-$  extrusion in hyperosmotic environments  
384 (c.f. (Marshall and Singer, 2002), CFTR expression increased by 6 h following a transfer from  
385 FW and TF to SW and decreased by 6 h following a transfer from SW and TS to FW. These  
386 early responses in CFTR transcription are consistent with our previous immunofluorescence  
387 observations showing that CFTR signal intensity changed between the two phases of the tidal  
388 cycle (Moorman et al., 2014). Together, these data suggest that changes in CFTR expression  
389 elicit early responses that are immediately important when facing osmotic challenges and hence  
390 crucial for surviving a hyperosmotic challenge. Changes in NKCC, on the other hand, are slower  
391 and appear to be involved in a later response necessary for extended acclimation to a  
392 hyperosmotic environment.

393 Aquaporin 3 is a member of a family of integral membrane pore proteins that facilitate  
394 water transport across cell membranes (Agre et al., 2002). AQP3 has been localized in the  
395 basolateral membrane of ionocytes in the gill, which is consistent with its proposed role in  
396 cellular volume regulation and as an osmosensor (Watanabe et al., 2005; Madsen et al., 2014). A  
397 study using the European eel, *Anguilla anguilla*, has shown that AQP3 is crucial for maintaining  
398 water balance in FW and that when fish are transferred to SW, branchial AQP3 expression is  
399 downregulated (Cutler and Cramb, 2002). A study of Japanese medaka, *Oryzias latipes*, showed

400 that branchial mRNA expression of AQP3 was higher in FW than in SW fish (Madsen et al.,  
401 2014). High branchial AQP3 expression in a hyperosmotic environment, therefore, could lead to  
402 excessive water loss, and consequent increase in plasma osmolality to lethal levels. Similarly, the  
403 inability of tilapia to reduce AQP3 during an acute transfer from FW to SW could have  
404 contributed to the failure to lower plasma osmolality and subsequent mortality. By contrast, upon  
405 transfer of tidal fish to SW, AQP3 gene expression became reduced and plasma osmolality did  
406 not rise to lethal levels. While this characterization is limited to transcriptional regulation, it  
407 provides insight into future studies aimed at characterizing the contribution of aquaporins to salt  
408 and water balance during salinity acclimation.

409 Taking into account rearing conditions and life histories of each species is essential to  
410 determining the extent and plasticity of osmoregulatory ability. The importance of rearing  
411 history on osmoregulation has been suggested for killifish. Specifically, it has been shown that  
412 maintaining killifish in a tidally-changing salinity enables them to move to both higher and lower  
413 salinities than is usual during short times with little osmotic disturbance (Wood and Grosell,  
414 2009). Our current results clearly demonstrate that the ability of Mozambique tilapia to adapt to  
415 osmotic challenges is dependent on their rearing salinity history and is facilitated by previous  
416 exposure to cyclical salinity variations. Applying the tilapia model to determine the ability of  
417 euryhaline species to adapt to osmotic challenges will expand our understanding of how  
418 environmental salinity modulates osmoregulatory physiology over a fish's life history.

419

## 420 **4. Materials and Methods**

421

### 422 *4.1 Fish Rearing*

423

424 Mozambique tilapia (*Oreochromis mossambicus*) yolk-sac larvae were collected from  
425 broodstock tanks maintained in FW at the Hawaii Institute of Marine Biology (Kaneohe, HI,  
426 USA). The fry were kept in 75 l glass aquaria supplied with circulating FW until yolk-sac  
427 absorption was complete. The fish were then combined into one 75 l aquarium, containing FW.  
428 Two days after yolk-sac absorption they were distributed into eight 75 l glass aquaria supplied  
429 with FW (3 L/min) and stocked at a density of 100 fish per tank (mean weight,  $12 \pm 1$  mg, was not  
430 significantly different between the two replicate experiments). Water temperature was



431 maintained at  $25\pm 1^\circ\text{C}$  in all tanks. The fish were exposed to a 12L:12D cycle. Fish were fed  
432 crushed Silver Cup Flake food (Silver Cup, Harrietta, MI, USA) *ad libitum* daily. After two days  
433 in FW, six of the eight tanks were transitioned from FW to BW (10 ‰) over the course of 3 h,  
434 composed of sea water (SW; 35 ‰ Kaneohe Bay, HI, USA) diluted with FW. After an additional  
435 two days, two of the BW tanks were transitioned to SW over the course of 3 h and the other four  
436 other tanks were maintained under a tidally-changing salinity. As a result, the salinity in eight  
437 tanks was adjusted as follows: two FW, two SW, and four in a tidally-changing salinity.

438 The rearing of tilapia in tidally-changing salinities has been recently described (Moorman  
439 et al., 2014). Briefly, tanks subjected to the tidally-changing salinity alternated between FW and  
440 SW every 6 h yielding a complete salinity transfer within 1.5 h. The fish were maintained in  
441 these conditions for four months. After four months the salinity of one of the FW tanks and one  
442 of the tidal tanks was switched to SW, and that of one SW tank and one tidal tank was switched  
443 to FW (Fig. 6). It took 1.5 h for a complete salinity transfer. Ten fish were sampled from each  
444 tank at 6 h, 24 h, 48 h, and 7 d after the transfer. TF fish and TS fish refer to fish sampled 30  
445 minutes prior to the end of the FW and SW phases of the tidal cycle respectively. All  
446 experiments were conducted in accordance with the principles and procedures approved by the  
447 Institutional Animal Care and Use Committee, University of Hawaii.

#### 448 449 *4.2 Treatments and sampling*

450  
451 At the time of sampling, fish were netted and anesthetized with 2-phenoxyethanol (0.3  
452 ml/L). Blood was collected with a needle and syringe coated with sodium heparin (200 U/ml,  
453 Sigma-Aldrich, St. Louis, MO, USA). Plasma was separated by centrifugation and stored at -  
454  $80^\circ\text{C}$  until later analyses. Fish were rapidly decapitated and the pituitary was removed. Filaments  
455 from the second gill arch on the left side of the fish were harvested. Pituitary and gill samples  
456 were frozen in liquid nitrogen and stored at  $-80^\circ\text{C}$  prior to RNA extraction.

#### 457 458 *4.3 Quantitative real-time PCR (qRT-PCR)*

459  
460 Total RNA was extracted from frozen gill samples using TRI Reagent according to the  
461 manufacturer's protocol (Molecular Research Center, Cincinnati, OH, USA) and then quantified



462 with a Nano-Drop 1000 spectrophotometer (Thermo Scientific, Wilmington, DE). Using High  
463 Capacity cDNA Reverse Transcription Kit (Life Technologies, Carlsbad, CA, USA), 500 ng of  
464 total RNA was reverse transcribed into cDNA. The quantitative real-time PCRs (qRT-PCR) were  
465 set up as previously described (Pierce et al., 2007). The mRNA levels of reference and target  
466 genes were determined by the relative quantification method as specified by StepOne Software v  
467 2.0 (Life Technologies). Standard curves were generated from 5-fold serial dilutions of cDNA  
468 transcribed from FW pituitary mRNA for pituitary samples and FW gill mRNA for gill samples.  
469 The  $R^2$  values and amplification efficiencies for standard curves were as follows, respectively:  
470 0.993 and 98.2% (EF1 $\alpha$ ), 0.998 and 95.9% (PRL<sub>188</sub>), 0.999 and 93.2% (PRLR1), 0.992 and  
471 83.1% (PRLR2), 0.992 and 98.1% (NCC), 0.992 and 89.8% (NKCC1a), 0.997 and 103% (NKA  
472  $\alpha$ 1a), 0.997 and 98.1% (NKA  $\alpha$ 1b), 0.984 and 105% (CFTR), 0.968 and 106% (AQP3), and  
473 0.999 and 96.3% (NHE3). All primer pairs employed in this study have been previously  
474 described: NCC, NHE3, and NKCC1a (Inokuchi et al., 2008); NKA  $\alpha$ 1a and NKA  $\alpha$ 1b  
475 (Tipsmark et al., 2011); EF1 $\alpha$  (Breves et al., 2010a); PRLR1 (Pierce et al., 2007); PRLR2  
476 (Breves et al., 2010c); AQP3 (Watanabe et al., 2005); CFTR (Moorman et al., 2014); and PRL<sub>188</sub>  
477 (Magdeldin et al., 2007). The PCR mixture (15  $\mu$ L) contained 7.5  $\mu$ L of 2X Power SYBR Green  
478 PCR Master Mix (Life Technologies), 200 nM of each primer, and 2  $\mu$ L of cDNA. The following  
479 cycling parameters were employed: 2 min at 50°C, 10 min at 95°C followed by 40 cycles at  
480 95°C for 15 s and 60°C for 1 min using the StepOnePlus real-time PCR system (Life  
481 Technologies). The measured values of target genes were normalized to those of EF1 $\alpha$ , which  
482 did not vary significantly across treatments (One-way ANOVA,  $p > 0.05$ ). Data are expressed as  
483 fold-change from FW values.

484

#### 485 4.4 Plasma Parameters

486

487 Plasma osmolality was measured using a vapor pressure osmometer (Wescor 5100C,  
488 Logan, UT, USA). Two forms of PRL, PRL<sub>177</sub> and PRL<sub>188</sub> are produced in the *rostral pars*  
489 *distalis* (RPD) of the tilapia pituitary. While PRL<sub>177</sub> and PRL<sub>188</sub> release from cultured RPDs or  
490 dispersed PRL cells have shown a similar pattern of response following changes in osmolality,  
491 the response in PRL<sub>188</sub> is more robust (Seale et al., 2012b). For this reason, only plasma PRL<sub>188</sub>,  
492 referred to as PRL in this study, was measured. Determination of plasma PRL was carried out by

493 homologous radioimmunoassay (RIA) as described by Ayson and colleagues (Ayson et al.,  
494 1993).

495

#### 496 *4.5 Statistical Analysis*

497

498 Statistical analyses were conducted by two-way analysis of variance (ANOVA) with  
499 salinity rearing regime and time as the independent variables. Significant main effects of salinity  
500 rearing regime and time ( $P < 0.05$ ) were followed up by the Fisher LSD test. Data are expressed as  
501 means  $\pm$  S.E.M. When necessary, individual values were log-transformed to meet assumptions of  
502 normality and equal variance. Each replicate experiment was analyzed individually and after  
503 determining that the results were consistent between the two experiments the data were  
504 combined. Statistical calculations were performed using a statistical software program, Prism 6.0  
505 (GraphPad, La Jolla, CA, USA).

506

507 **SYMBOLS AND ABBREVIATIONS**

- 508 AQP3 = Aquaporin 3
- 509 BW = Brackish water
- 510 CFTR = Cystic fibrosis transmembrane conductance regulator
- 511 EF1 $\alpha$  = Elongation Factor 1 $\alpha$
- 512 FW = Fresh water
- 513 IHC = Immunohistochemistry
- 514 NCC = Na<sup>+</sup>/Cl<sup>-</sup> cotransporter
- 515 NHE3 = Na<sup>+</sup>/H<sup>+</sup> exchanger 3
- 516 NKA = Na<sup>+</sup>/K<sup>+</sup>-ATPase
- 517 NKCC = Na<sup>+</sup>/K<sup>+</sup>/2Cl<sup>-</sup> cotransporter
- 518 PRL = Prolactin
- 519 PRLR = Prolactin Receptor
- 520 qRT-PCR = quantitative real-time PCR
- 521 RIA = Radioimmunoassay
- 522 RPD =Rostral pars distalis
- 523 SW = Seawater
- 524 TF = Fish sampled at that end of the FW phase of the tidal cycle
- 525 TS = Fish sampled at the end of the SW phase of the tidal cycle
- 526
- 527
- 528
- 529

530 **ACKNOWLEDGEMENTS**

531

532 We would like to thank Drs. Yoko Yamaguchi and Mayu Inokuchi of the Hawaii Institute  
533 of Marine Biology for their valuable scientific advice and guidance through techniques we used  
534 in our experiments.

535

536 **COMPETING INTERESTS**

537 No competing interests are declared.

538

539 **AUTHOR CONTRIBUTIONS**

540

541 B.P.M. conducted the experiments, analyzed the data, and wrote the manuscript. A.P.S.  
542 conducted experiments and assisted with writing the manuscript. All authors were involved in  
543 the conception and design of the experiments, data interpretation, and critical revisions of the  
544 manuscript.

545

546 **FUNDING**

547

548 This work was funded by grants from the National Science Foundation (IOS-1119693),  
549 the Edwin W. Pauley Foundation (2012), and the Binational Agricultural Research Development  
550 (BARD) fund (IS-4296-10) to E.G.G. and D.T.L, the National Oceanic and Atmospheric  
551 Administration (NA14OAR4170071) which is sponsored by the University of Hawaii Sea Grant  
552 College Program, SOEST (Project R/SS-12) to A.P.S., and the University of Hawaii NSF  
553 EPSCoR program (EPS-0903833) in support of the Core Genetics Facility at the Hawaii Institute  
554 of Marine Biology, University of Hawaii. The views expressed herein are those of the authors  
555 and do not necessarily reflect the views of the aforementioned granting agencies. University of  
556 Hawaii Sea Grant publication number UNIHI-SEAGRANT-JC-14-7.

557

558

559

560

561 **References:**

- 562 **Agre, P., King, L., Yasui, M., Guggino, W., Ottersen, O., Fujiyoshi, Y., Engel, A. and**  
563 **Nielsen, S.** (2002). Aquaporin water channels--from atomic structure to clinical medicine. *J.*  
564 *Physiol.* **542**, 3-16.
- 565 **Ayson, F. G., Kaneko, T., Tagawa, M., Hasegawa, S., Grau, E. G., Nishioka, R. S., King, D.**  
566 **S., Bern, H. A. and Hirano, T.** (1993). Effects of acclimation to hypertonic environment on  
567 plasma and pituitary levels of two prolactins and growth hormone in two species of tilapia,  
568 *Oreochromis mossambicus* and *Oreochromis niloticus*. *Gen. Comp. Endocrinol.* **89**, 138-148.
- 569 **Berdan, E. L. and Fuller, R. C.** (2012). Interspecific divergence of ionoregulatory physiology  
570 in killifish: insight into adaptation and speciation. *J. Zool.* **287**, 283-291.
- 571 **Bern, H. A.** (1983). Functional Evolution of Prolactin and Growth Hormone in Lower  
572 Vertebrates. *Amer. Zool.* **23**, 663-671.
- 573 **Borski, R. J., Hansen, M. U., Nishioka, R. S. and Grau, E. G.** (1992). Differential processing  
574 of the 2 prolactins of the tilapia (*Oreochromis mossambicus*) in relation to environmental  
575 salinity. *J. Exp. Zool.* **264**, 46-54.
- 576 **Breves, J. P., Hirano, T. and Grau, E. G.** (2010a). Ionoregulatory and endocrine responses to  
577 disturbed salt and water balance in Mozambique tilapia exposed to confinement and handling  
578 stress. *Comp. Biochem. Physiol.* **155**, 294-300.
- 579 **Breves, J. P., Watanabe, S., Kaneko, T., Hirano, T. and Grau, E. G.** (2010b). Prolactin  
580 restores branchial mitochondrion-rich cells expressing Na<sup>+</sup>/Cl<sup>-</sup> cotransporter in  
581 hypophysectomized Mozambique tilapia. *Am J Physiol Regul Integr Comp Physiol* **299**, R702-  
582 710.
- 583 **Breves, J. P., Watanabe, S., Kaneko, T., Hirano, T. and Grau, E. G.** (2010c). Prolactin  
584 restores branchial mitochondrion-rich cells expressing Na<sup>(+)</sup>/Cl<sup>(-)</sup> cotransporter in  
585 hypophysectomized Mozambique tilapia. *Am. J. Physiol. Regul. Integr. Comp. Physiol.* **299**,  
586 R702-R710.
- 587 **Breves, J. P., Fox, B. K., Pierce, A. L., Hirano, T. and Grau, E. G.** (2010d). Gene Expression  
588 of Growth Hormone Family and Glucocorticoid Receptors, Osmosensors, and Ion Transporters  
589 in the Gill During Seawater Acclimation of Mozambique Tilapia, *Oreochromis mossambicus*. *J.*  
590 *Exp. Zool.* **313A**, 432-441.
- 591 **Breves, J. P., Seale, A. P., Helms, R. E., Tipsmark, C. K., Hirano, T. and Grau, E. G.**  
592 (2011). Dynamic gene expression of GH/PRL-family hormone receptors in gill and kidney  
593 during freshwater-acclimation of Mozambique tilapia. *Comp. Biochem. Physiol.* **158**, 194-200.
- 594 **Breves, J. P., Hasegawa, S., Yoshioka, M., Fox, B. K., Davis, L. K., Lerner, D. T., Takei, Y.,**  
595 **Hirano, T. and Grau, E. G.** (2010e). Acute salinity challenges in Mozambique and Nile tilapia:  
596 Differential responses of plasma prolactin, growth hormone and branchial expression of ion  
597 transporters. *Gen. Comp. Endocrinol.* **167**, 135-142.
- 598 **Cutler, C. P. and Cramb, G.** (2002). Branchial expression of an aquaporin 3 (AQP-3)  
599 homologue is downregulated in the European eel *Anguilla anguilla* following seawater  
600 acclimation. *J. Exp. Biol.* **205**, 2643-2651.
- 601 **Dharmamba, M., Handin, R. I., Nandi, J. and Bern, H. A.** (1967). Effect of prolactin on  
602 freshwater survival and on plasma osmotic pressure of hypophysectomized *Tilapia mossambica*.  
603 *Gen. Comp. Endo.* **9**, 295-302.
- 604 **Dharmamba, M., Mayer-Gostan, N., Maetz, J. and Bern, H. A.** (1973). Effect of prolactin on  
605 sodium movement in *Tilapia mossambica* adapted to sea water. *Gen. Comp. Endo.* **21**, 179-187.

- 606 **Evans, D. H., Piermarini, P. M. and Choe, K. P.** (2005). The multifunctional fish gill:  
607 Dominant site of gas exchange, osmoregulation, acid-base regulation, and excretion of  
608 nitrogenous waste. *Physiol. Rev.* **85**, 97-177.
- 609 **Fiess, J. C., Kunkel-Patterson, A., Mathias, L., Riley, L. G., Yancey, P. H., Hirano, T. and**  
610 **Grau, F. G.** (2007). Effects of environmental salinity and temperature on osmoregulatory  
611 ability, organic osmolytes, and plasma hormone profiles in the Mozambique tilapia  
612 (*Oreochromis mossambicus*). *Comp. Biochem. Physiol.* **146**, 252-264.
- 613 **Fiol, D. F., Sanmarti, E., Sacchi, R. and Kultz, D.** (2009). A novel tilapia prolactin receptor is  
614 functionally distinct from its paralog. *J. Exp. Biol.* **212**, 2006-2014.
- 615 **Grau, E. G., Nishioka, R. S. and Bern, H. A.** (1981). Effects of osmotic-pressure and calcium-  
616 ion on prolactin-release invitro from the rostral pars-distalis of the tilapia *Sartherodon-*  
617 *mossambicus*. *Gen. Comp. Endocrinol.* **45**, 406-408.
- 618 **Heijden, A., Verboost, P., Eygensteyn, J., Li, J., Bonga, S. and Flik, G.** (1997). Mitochondria-  
619 rich cells in gills of tilapia (*Oreochromis mossambicus*) adapted to fresh water or sea water:  
620 quantification by confocal laser scanning microscopy. *J. Exp. Biol.* **200**, 55-64.
- 621 **Helms, L. M. H., Grau, E. G. and Borski, R. J.** (1991). Effects of osmotic-pressure and  
622 somatostatin on the cAMP messenger system of the osmosensitive prolactin cell of a teleost fish,  
623 the tilapia (*Oreochromis-mossambicus*). *Gen. Comp. Endocrinol.* **83**, 111-117.
- 624 **Hiroi, J. and McCormick, S. D.** (2012). New insights into gill ionocyte and ion transporter  
625 function in euryhaline and diadromous fish. *Respir. Physiol. Neuro.* **184**, 257-268.
- 626 **Hiroi, J., McCormick, S. D., Ohtani-Kaneko, R. and Kaneko, T.** (2005). Functional  
627 classification of mitochondrion-rich cells in euryhaline Mozambique tilapia (*Oreochromis*  
628 *mossambicus*) embryos, by means of triple immunofluorescence staining for Na<sup>+</sup>/K<sup>+</sup>-ATPase,  
629 Na<sup>+</sup>/K<sup>+</sup>/2Cl<sup>-</sup> cotransporter and CFTR anion channel. *J. Exp. Biol.* **208**, 2023-2036.
- 630 **Hiroi, J., Yasumasu, S., McCormick, S. D., Hwang, P. P. and Kaneko, T.** (2008). Evidence  
631 for an apical Na-Cl cotransporter involved in ion uptake in a teleost fish. *J. Exp. Biol.* **211**, 2584-  
632 2599.
- 633 **Inokuchi, M., Hiroi, J., Watanabe, S., Lee, K. M. and Kaneko, T.** (2008). Gene expression  
634 and morphological localization of NHE3, NCC and NKCC1a in branchial mitochondria-rich  
635 cells of Mozambique tilapia (*Oreochromis mossambicus*) acclimated to a wide range of  
636 salinities. *Comp. Biochem. Physiol.* **151**, 151-158.
- 637 **Inokuchi, M., Hiroi, J., Watanabe, S., Hwang, P. P. and Kaneko, T.** (2009). Morphological  
638 and functional classification of ion-absorbing mitochondria-rich cells in the gills of Mozambique  
639 tilapia. *J. Exp. Biol.* **212**, 1003-1010.
- 640 **Kajimura, S., Hirano, T., Moriyama, S., Vakkuri, O., Leppaluoto, J. and Grau, E. G.**  
641 (2004). Changes in plasma concentrations of immunoreactive ouabain in the tilapia in response  
642 to changing salinity: is ouabain a hormone in fish? *Gen. Comp. Endocrinol.* **135**, 90-99.
- 643 **Kaneko, T., Watanabe, S., Lee, K.M.,** (2008). Functional morphology of mitochondrion-rich  
644 cells in euryhaline and stenohaline teleosts. *Aqua-BioSci. Monogr.* **1**, 1-62.
- 645 **Madsen, S. S., Kiilerich, P. and Tipsmark, C. K.** (2009). Multiplicity of expression of  
646 Na<sup>+</sup>,K<sup>+</sup>-ATPase alpha-subunit isoforms in the gill of Atlantic salmon (*Salmo salar*): cellular  
647 localisation and absolute quantification in response to salinity change. *J. Exp. Biol.* **212**, 78-88.
- 648 **Madsen, S. S., Bujak, J. and Tipsmark, C. K.** (2014). Aquaporin expression in the Japanese  
649 medaka (*Oryzias latipes*) in freshwater and seawater: challenging the paradigm of intestinal  
650 water transport? *J. Exp. Biol.* **217**, 3108-3121.



- 651 **Magdeldin, S., Uchida, K., Hirano, T., Grau, G., Abdelfattah, A. and Nozaki, M.** (2007).  
652 Effects of environmental salinity on somatic growth and growth hormone/insulin-like growth  
653 factor-I axis in juvenile tilapia *Oreochromis mossambicus*. *Fish. Sci.* **73**, 1025-1034.
- 654 **Manzon, L. A.** (2002). The role of prolactin in fish osmoregulation: A review. *Gen. Comp.*  
655 *Endocrinol.* **125**, 291-310.
- 656 **Marshall, W. S. and Singer, T. D.** (2002). Cystic fibrosis transmembrane conductance regulator  
657 in teleost fish. *Biochim. Biophys. Acta-Biomembr.* **1566**, 16-27.
- 658 **Marshall, W. S., Grosell, M.,** (2006). Ion transport, osmoregulation and acid-base balance. In  
659 *Physiology of Fishes*, (ed. D. H. Evans, Claiborne J. B.), pp. 177-230. Boca Raton, FL: CRC  
660 Press.
- 661 **McCormick, S. D., Regish, A. M. and Christensen, A. K.** (2009). Distinct freshwater and  
662 seawater isoforms of Na<sup>+</sup>/K<sup>+</sup>-ATPase in gill chloride cells of Atlantic salmon. *J. Exp. Bio.* **212**,  
663 3994-4001.
- 664 **Moorman, B. P., Inokuchi, M., Yamaguchi, Y., Lerner, D. T., Grau, E. G. and Seale, A. P.**  
665 (2014). The osmoregulatory effects of rearing Mozambique tilapia in a tidally changing salinity.  
666 *Gen. Comp. Endocrinol.*
- 667 **Nagahama, Y., Nishioka, R. S., Bern, H. A. and Gunther, R. L.** (1975). Control of prolactin  
668 secretion in teleosts, with special reference to *Gillichthys mirabilis* and *Tilapia mossambica*.  
669 *Gen. Comp. Endo.* **25**, 166-188.
- 670 **Ouattara, N., Bodinier, C., Negre-Sadargues, G., D'Cotta, H., Messad, S., Charmantier, G.,**  
671 **Panfili, J. and Baroiller, J. F.** (2009). Changes in gill ionocyte morphology and function  
672 following transfer from fresh to hypersaline waters in the tilapia *Sarotherodon melanotheron*.  
673 *Aquaculture* **290**, 155-164.
- 674 **Pickford, G. E. and Phillips, J. G.** (1959). Prolactin, a factor in promoting survival of  
675 hypophysectomized killifish in fresh water. *Science* **130**, 454-455.
- 676 **Pierce, A. L., Fox, B. K., Davis, L. K., Visitacion, N., Kitahashi, T., Hirano, T. and Grau, E.**  
677 **G.** (2007). Prolactin receptor, growth hormone receptor, and putative somatolactin receptor in  
678 Mozambique tilapia: Tissue specific expression and differential regulation by salinity and  
679 fasting. *Gen. Comp. Endocrinol.* **154**, 31-40.
- 680 **Richards, J. G., Semple, J. W., Bystriansky, J. S. and Schulte, P. M.** (2003). Na<sup>+</sup>/K<sup>+</sup>-ATPase  
681 (alpha-isoform switching in gills of rainbow trout (*Oncorhynchus mykiss*) during salinity  
682 transfer. *J. Exp. Bio.* **206**, 4475-4486.
- 683 **Sakamoto, T., Shepherd, B. S., Madsen, S. S., Nishioka, R. S., Siharath, K., Richman, N. H.,**  
684 **Bern, H. A. and Grau, E. G.** (1997). Osmoregulatory actions of growth hormone and prolactin  
685 in an advanced teleost. *Gen. Comp. Endocrinol.* **106**, 95-101.
- 686 **Seale, A. P., Hirano, T. and Grau, E. G.** (2006a). Osmoreception: a fish model for a  
687 fundamental sensory modality. In *Fish Endocrinol.*, (ed. M. Reinecke, Zaccane, G., Kapoor,  
688 B.G.), pp. 419-440. Enfield, NH: Science Publishers.
- 689 **Seale, A. P., Watanabe, S. and Grau, E. G.** (2012a). Osmoreception: Perspectives on signal  
690 transduction and environmental modulation. *Gen. Comp. Endocrinol.* **176**, 354-360.
- 691 **Seale, A. P., Fiess, J. C., Hirano, T., Cooke, I. M. and Grau, E. G.** (2006b). Disparate release  
692 of prolactin and growth hormone from the tilapia pituitary in response to osmotic stimulation.  
693 *Gen. Comp. Endocrinol.* **145**, 222-231.
- 694 **Seale, A. P., Moorman, B. P., Stagg, J. J., Breves, J. P., Lerner, D. T. and Grau, E. G.**  
695 (2012b). Prolactin177, prolactin188 and prolactin receptor 2 in the pituitary of the euryhaline  
696 tilapia, *Oreochromis mossambicus*, are differentially osmosensitive. *J. Endocrinol.* **213**, 89-98.



- 697 **Seale, A. P., Watanabe, S., Breves, J. P., Lerner, D. T., Kaneko, T. and Grau, E. G.** (2012c).  
698 Differential regulation of TRPV4 mRNA levels by acclimation salinity and extracellular  
699 osmolality in euryhaline tilapia. *Gen. Comp. Endocrinol.* **178**, 123-130.
- 700 **Seale, A. P., Riley, L. G., Leedom, T. A., Kajimura, S., Dores, R. M., Hirano, T. and Grau,**  
701 **E. G.** (2002). Effects of environmental osmolality on release of prolactin, growth hormone and  
702 ACTH from the tilapia pituitary. *Gen. Comp. Endocrinol.* **128**, 91-101.
- 703 **Shepherd, B. S., Sakamoto, T., Hyodo, S., Nishioka, R. S., Ball, C., Bern, H. A. and Grau,**  
704 **E. G.** (1999). Is the primitive regulation of pituitary prolactin (tPRL(177) and tPRL(188))  
705 secretion and gene expression in the euryhaline tilapia (*Oreochromis mossambicus*)  
706 hypothalamic or environmental? *Journal of Endocrinology* **161**, 121-129.
- 707 **Stickney, R. R.** (1986). Tilapia tolerance of saline waters - A Review. *Progress. Fish-Cult.* **48**,  
708 161-167.
- 709 **Tipsmark, C. K., Breves, J. P., Seale, A. P., Lerner, D. T., Hirano, T. and Grau, E. G.**  
710 (2011). Switching of Na(+), K(+)-ATPase isoforms by salinity and prolactin in the gill of a  
711 cichlid fish. *J. Endocrinol.* **209**, 237-244.
- 712 **Trewevas.** (1983). Tilapiine Fishes of the Genera Sarotherodon, Oreochromis and Danakilia.  
713 Ithaca, New York: Comstock Publishing Associates.
- 714 **Uchida, K., Kaneko, T., Miyazaki, H., Hasegawa, S. and Hirano, T.** (2000). Excellent salinity  
715 tolerance of Mozambique tilapia (*Oreochromis mossambicus*): Elevated chloride cell activity in  
716 the branchial and opercular epithelia of the fish adapted to concentrated seawater. *Zool. Sci.* **17**,  
717 149-160.
- 718 **Velan, A., Hulata, G., Ron, M. and Cnaani, A.** (2011). Comparative time-course study on  
719 pituitary and branchial response to salinity challenge in Mozambique tilapia (*Oreochromis*  
720 *mossambicus*) and Nile tilapia (*O. niloticus*). *Fish Physiol. Biochem.* **37**, 863-873.
- 721 **Wang, P. J., Lin, C. H., Hwang, L. Y., Huang, C. L., Lee, T. H. and Hwang, P. P.** (2009).  
722 Differential responses in gills of euryhaline tilapia, *Oreochromis mossambicus*, to various  
723 hyperosmotic shocks. *Comp. Biochem. Physiol.* **152**, 544-551.
- 724 **Watanabe, S., Kaneko, T. and Aida, K.** (2005). Aquaporin-3 expressed in the basolateral  
725 membrane of gill chloride cells in Mozambique tilapia *Oreochromis mossambicus* adapted to  
726 freshwater and seawater. *J. Exp. Biol.* **208**, 2673-2682.
- 727 **Watanabe, S., Niida, M., Maruyama, T. and Kaneko, T.** (2008). Na(+)/H(+) exchanger  
728 isoform 3 expressed in apical membrane of gill mitochondrion-rich cells in Mozambique tilapia  
729 *Oreochromis mossambicus*. *Fish. Sci.* **74**, 813-821.
- 730 **Wigham, T., Nishioka, R. S. and Bern, H. A.** (1977). Factors affecting *in vitro* activity of  
731 prolactin cells in euryhaline teleost Sarotherodon mossambicus (*Tilapia mossambica*). *Gen.*  
732 *Comp. Endo.* **32**, 120-131.
- 733 **Wood, C. M. and Grosell, M.** (2009). TEP on the tide in killifish (*Fundulus heteroclitus*):  
734 effects of progressively changing salinity and prior acclimation to intermediate or cycling  
735 salinity. *J. Comp. Physiol.* **179**, 459-467.
- 736 **Yada, T., Hirano, T. and Grau, E. G.** (1994). Changes in Plasma Levels of the Two Prolactins  
737 and Growth Hormone during Adaptation to Different Salinities in the Euryhaline Tilapia,  
738 *Oreochromis mossambicus*. *Gen. Comp. Endocrinol.* **93**, 214-223.

739

740

741

742 Figure Legends:

743

744 **Figure 1: Effects of acute salinity challenges on plasma osmolality (A) and plasma prolactin**  
745 **(B) in Mozambique tilapia (*Oreochromis mossambicus*) transferred from fresh water (FW)**  
746 **to seawater (SW), a tidally-changing salinity to SW, SW to FW, and a tidally-changing**  
747 **salinity to FW.** Fish were sampled 6 h, 24 h, 48 h, and 7 d after the salinity transfers. Values are  
748 expressed as means  $\pm$  S.E.M. (n = 10-20). Means not sharing the same letter are significantly  
749 different (two-way ANOVA, Fisher LSD test,  $P < 0.05$ ).

750

751 **Figure 2: Effects of acute salinity challenges on pituitary PRL mRNA expression (A),**  
752 **PRLR1 mRNA expression (B), and PRLR2 mRNA expression (C) in Mozambique tilapia**  
753 **(*Oreochromis mossambicus*) transferred from fresh water (FW) to seawater (SW), a tidally-**  
754 **changing salinity to SW, SW to FW, and a tidally-changing salinity to FW.** Fish were  
755 sampled 6 h, 24 h, 48 h, and 7 d after the salinity transfers. Values are expressed as means  $\pm$   
756 S.E.M. (n = 10-20). Means not sharing the same letter are significantly different (two-way  
757 ANOVA, Fisher LSD test,  $P < 0.05$ ).

758

759 **Figure 3: Effects of acute salinity challenges on branchial PRLR1 mRNA expression (A)**  
760 **and PRLR2 mRNA expression (B) in Mozambique tilapia (*Oreochromis mossambicus*)**  
761 **transferred from fresh water (FW) to seawater (SW), a tidally-changing salinity to SW, SW**  
762 **to FW, and a tidally-changing salinity to FW.** Fish were sampled 6 h, 24 h, 48 h, and 7 d after  
763 the salinity transfers. Values are expressed as means  $\pm$  S.E.M. (n = 10-20). Means not sharing the  
764 same letter are significantly different (two-way ANOVA, Fisher LSD test,  $P < 0.05$ ).

765

766

767 **Figure 4: Effects of acute salinity challenges on branchial NCC mRNA expression (A),**  
768 **NKCC1a mRNA expression (B), NKA  $\alpha$ 1a mRNA expression (C), and NKA  $\alpha$ 1b mRNA**  
769 **expression (D) in Mozambique tilapia (*Oreochromis mossambicus*) transferred from fresh**  
770 **water (FW) to seawater (SW), a tidally-changing salinity to SW, SW to FW, and a tidally-**  
771 **changing salinity to FW.** Fish were sampled 6 h, 24 h, 48 h, and 7 d after the salinity transfers.

772 Values are expressed as means  $\pm$  S.E.M. (n = 10-20). Means not sharing the same letter are  
773 significantly different (two-way ANOVA, Fisher LSD test, P < 0.05).

774

775 **Figure 5: Effects of acute salinity challenges on branchial CFTR mRNA expression (A),**  
776 **AQP3 mRNA expression (B), and NHE3 mRNA expression (C) in Mozambique tilapia**  
777 **(*Oreochromis mossambicus*) transferred from fresh water (FW) to seawater (SW), a tidally-**  
778 **changing salinity to SW, SW to FW, and a tidally-changing salinity to FW.** Fish were  
779 sampled 6 h, 24 h, 48 h, and 7 d after the salinity transfers. Values are expressed as means  $\pm$   
780 S.E.M. (n = 10-20). Means not sharing the same letter are significantly different (two-way  
781 ANOVA, Fisher LSD test, P < 0.05).

782

783 **Figure 6: Illustration of the tank setup for the experiment showing the initial salinity of the**  
784 **tank and the transferred condition. Fish were reared in fresh water (FW), seawater (SW),**  
785 **or a tidal environment (Tidal) which alternated between FW and SW every 6 h. The**  
786 **sampling conditions were FW, SW, a tidal condition with the fish sampled at the end of the**  
787 **fresh water phase of the cycle (TF) or sea water phase of the cycle (TS).**

788

# Figure 1

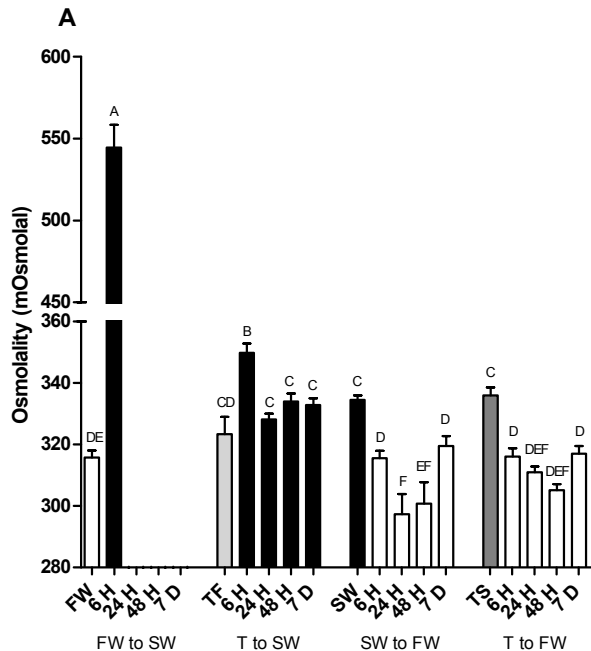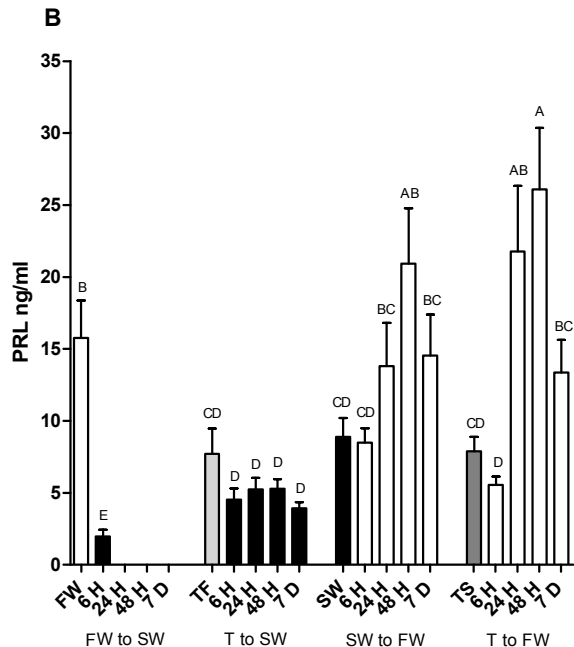

# Figure 2

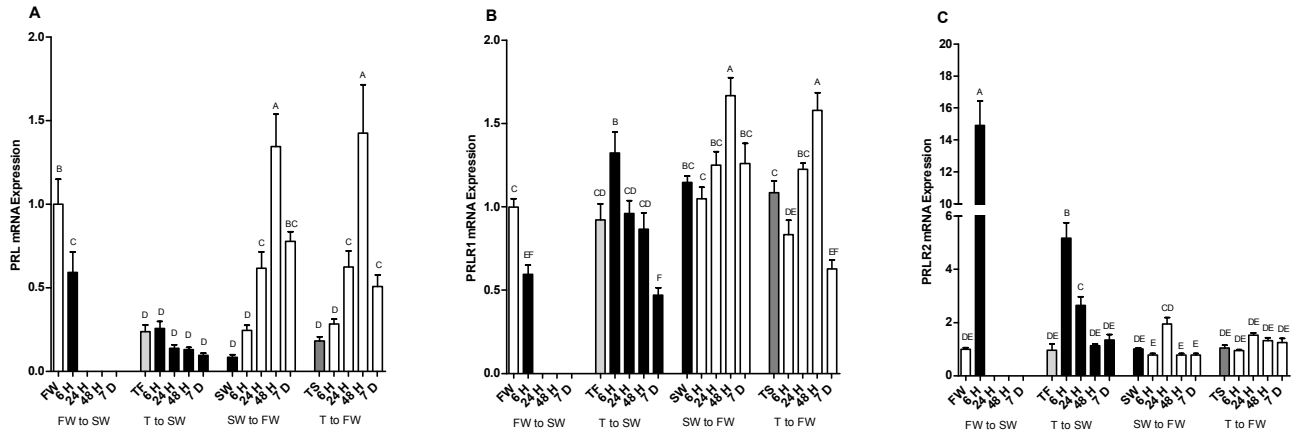

# Figure 3

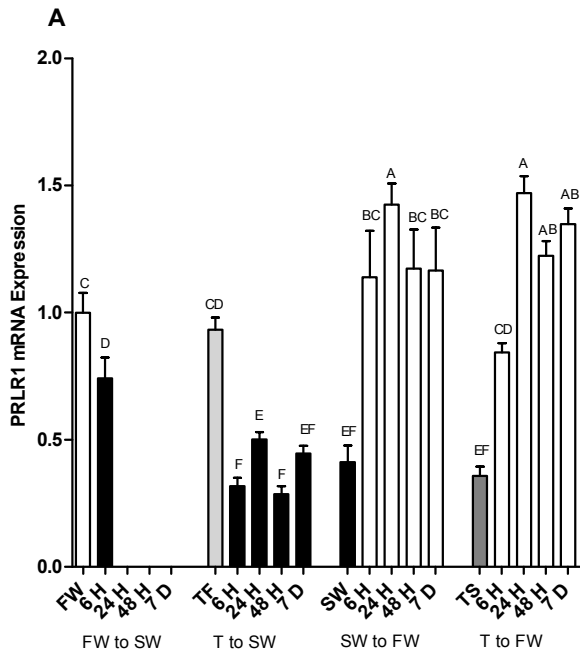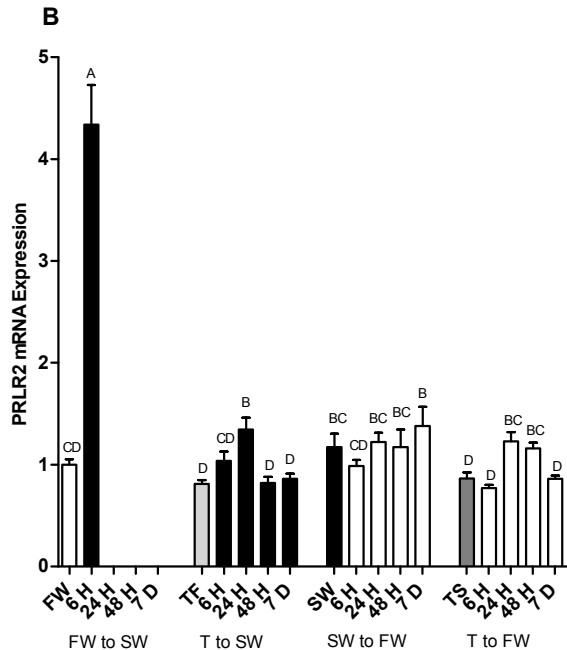

**Figure 4**

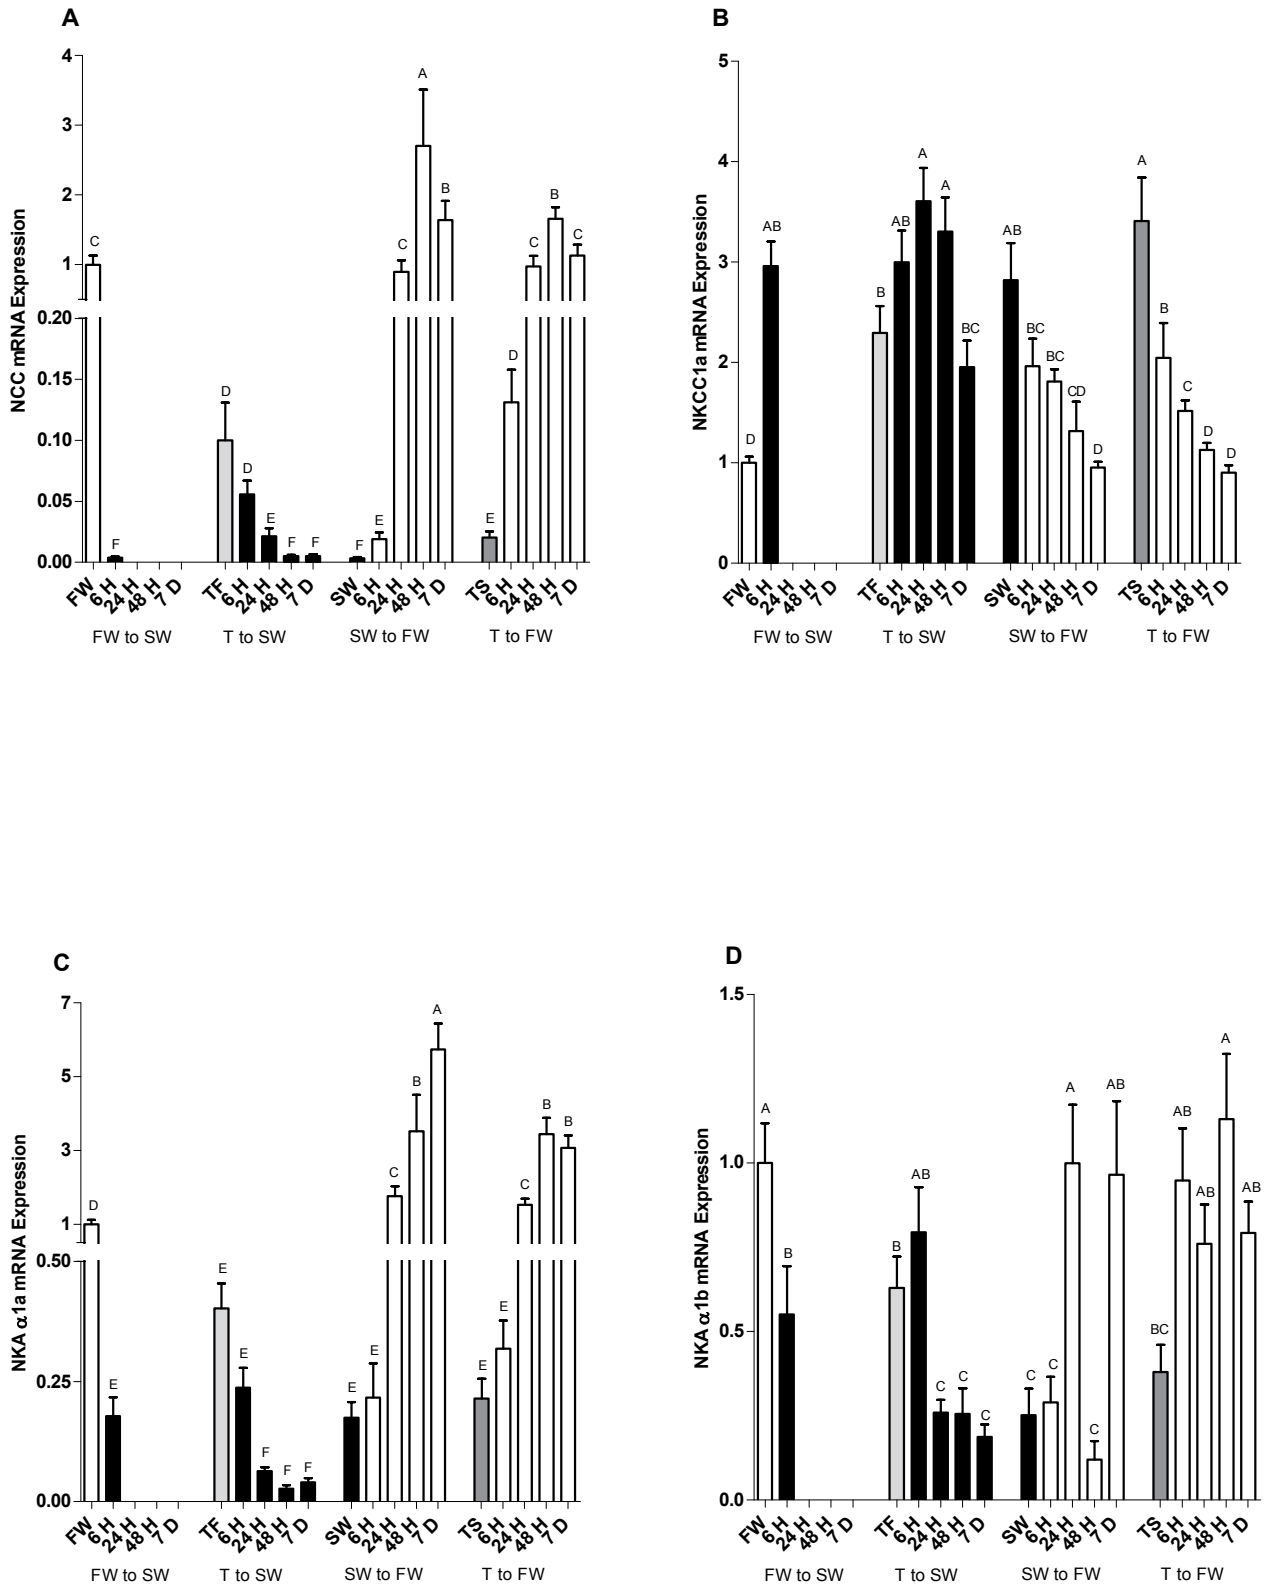



# Figure 5

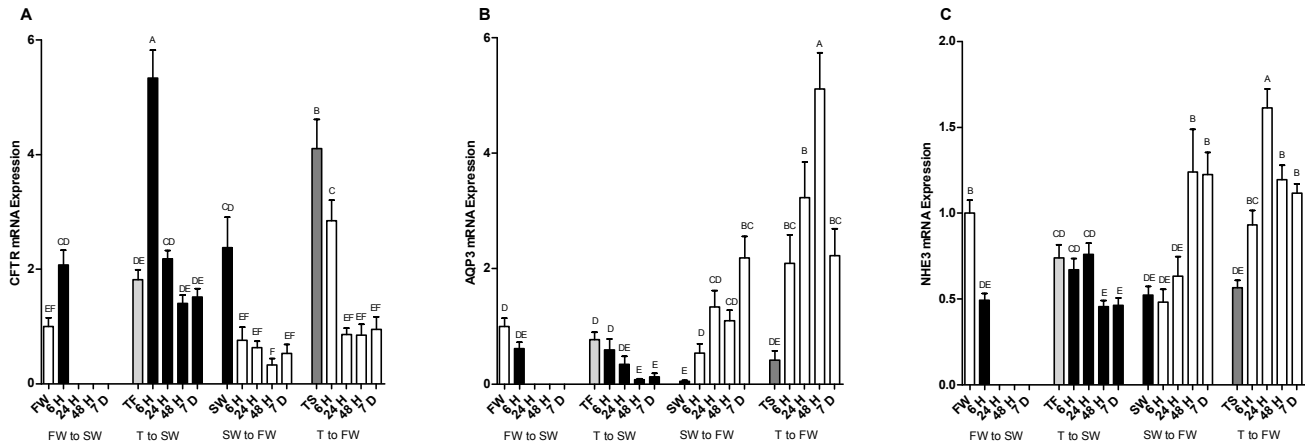

**Figure 6**

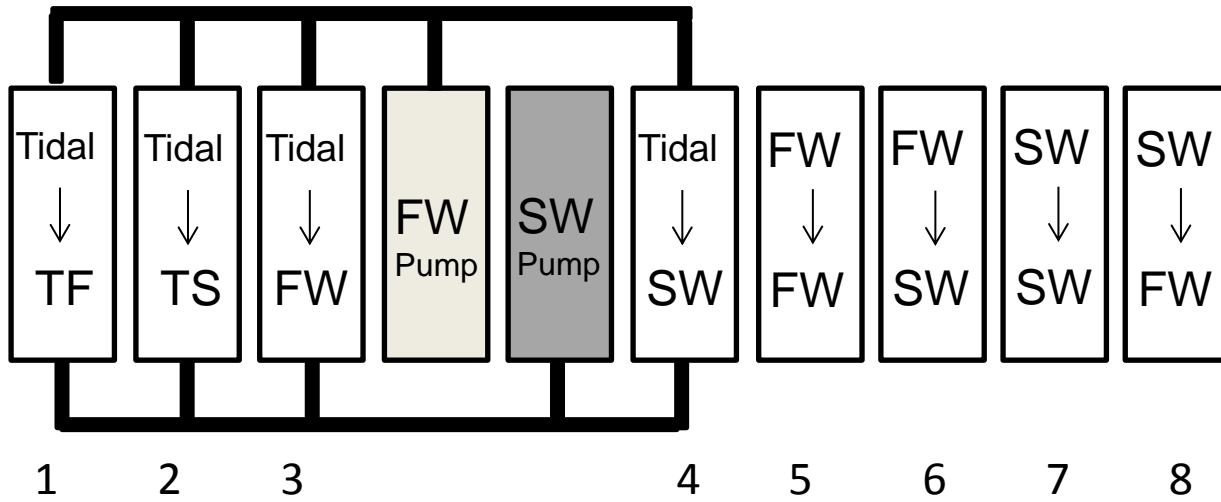

Source: https://cob.silverchair.com/jeb/article-pdf/doi/10.1242/jeb.112664/2033016/jeb_112664.pdf
